# Supplementary material for: Analysis of the gut microbiome using extracellular vesicles in the urine of patients with colorectal cancer
Source: PubMed Central journal article supplement — Korean J Intern Med. 2022 Nov 10;38(1):27–38. doi: 10.3904/kjim.2022.112 (PMC9816683; doi:10.3904/kjim.2022.112), 2022-11-10
Supplement: kjim-2022-112_suppl1.pdf [file kjim-2022-112_suppl1.pdf]

**Supplementary Table 1. Baseline characteristics of subjects**

| Variable                           | Colorectal cancer group (n = 91) | Control group (n = 116) | <i>p</i> value |
|------------------------------------|----------------------------------|-------------------------|----------------|
| Age, yr                            | 63.8 ± 10.1                      | 53.3 ± 8.5              | < 0.001        |
| Male sex                           | 55 (60.4)                        | 20 (17.2)               | < 0.001        |
| Smoking history                    | 44 (49.4)                        | 5 (4.3)                 | <0.001         |
| Alcohol history                    | 41 (46.6)                        | 33 (28.4)               | 0.012          |
| Body mass index, kg/m <sup>2</sup> | 24.47 ± 3.82                     | 25.35 ± 3.26            | 0.097          |

Values are presented as mean ± standard deviation or number (%).
